# Supplementary material for: A vertical WSe2–MoSe2 p–n heterostructure with tunable gate rectification
Source: Royal Society of Chemistry journal article supplement (doi:10.1039/c8ra03398f), 2018-01-01
Supplement: c8ra03398f1.pdf [file c8ra03398f1.pdf]

# Vertical WSe<sub>2</sub> -MoSe<sub>2</sub> p-n heterostructure with tunable gate rectification

Hailiang Liu<sup>†a, b</sup>, Sajjad Hussain<sup>†a, b</sup>, Ali Asif<sup>a, b</sup>, Bilal Abbas Naqvi<sup>a, b</sup>, Dhanasekaran Vikraman<sup>c</sup>,  
Woonyoung Jeong<sup>a, b</sup>, Wooseok Song<sup>d</sup>, Ki-Seok An<sup>d</sup> and Jongwan Jung<sup>\*a, b</sup>

<sup>a</sup>Graphene Research Institute, Sejong University, Seoul 143-747, Republic of Korea

<sup>b</sup>Institute of Nano and Advanced Materials Engineering, Sejong University, Seoul 143-747, Republic of Korea

<sup>c</sup>Division of Electronics and Electrical Engineering, Dongguk University-Seoul, Seoul 046 20, Republic of Korea

<sup>d</sup>Thin Film Materials Research Group, Korea Research Institute of Chemical Technology, Daejeon 305-600, Korea

\*Corresponding author E-mail: [jwjung@sejong.ac.kr](mailto:jwjung@sejong.ac.kr) (Jongwan Jung)

**Keywords:** MoSe<sub>2</sub>, WSe<sub>2</sub>, MoSe<sub>2</sub>/WSe<sub>2</sub> Heterostructures, Sputtering, p-n junction, rectification ratio

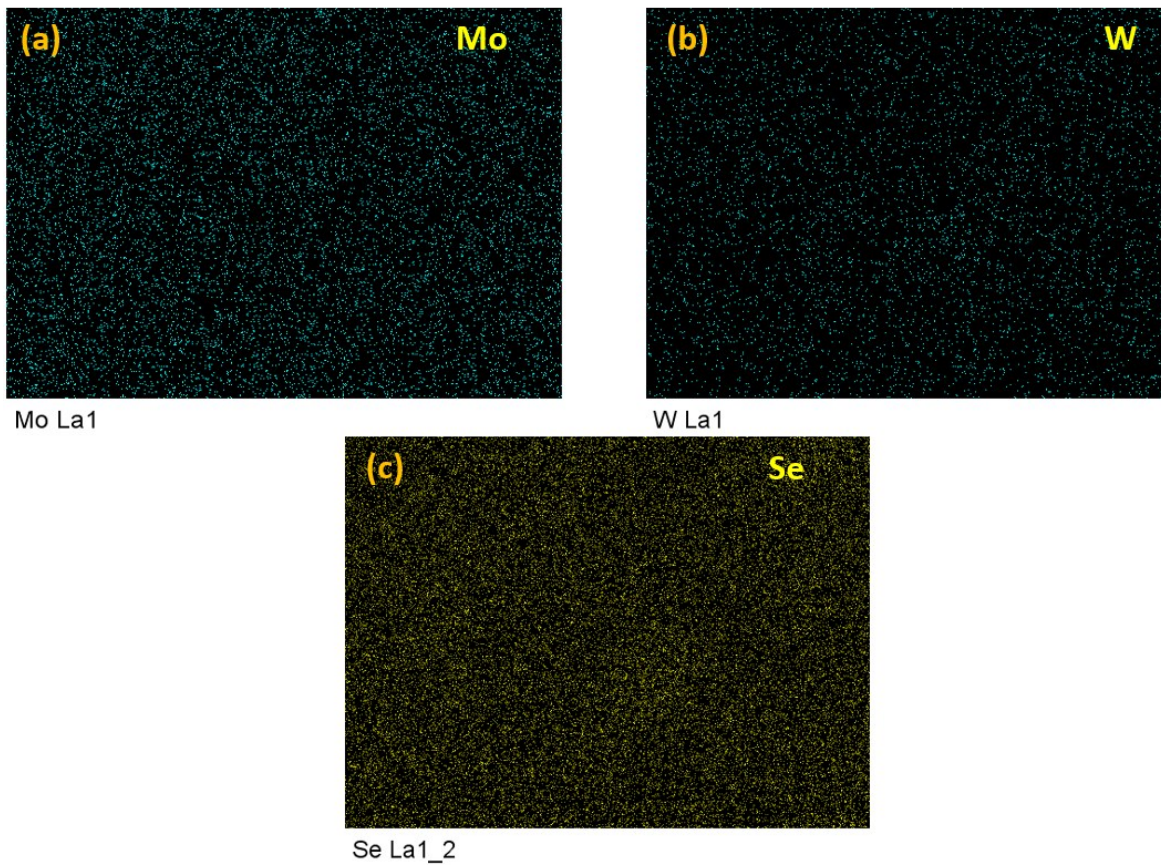

Figure S1. **(a-c)** FESEM elemental mapping images of  $WSe_2/MoSe_2$  (a) Mo, (b) W and (c) Se elements.

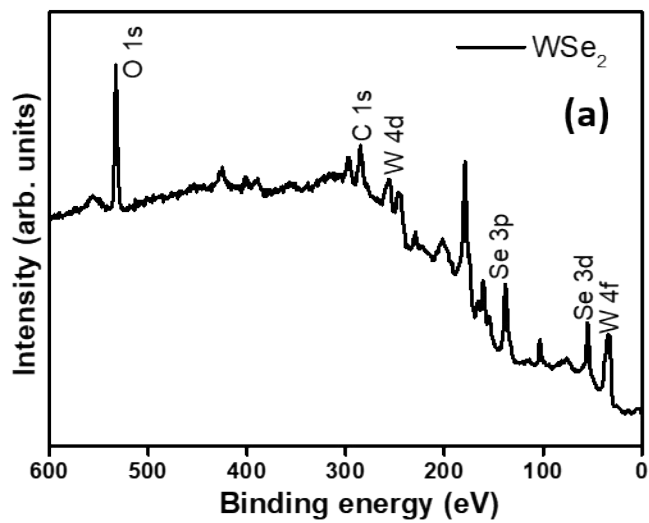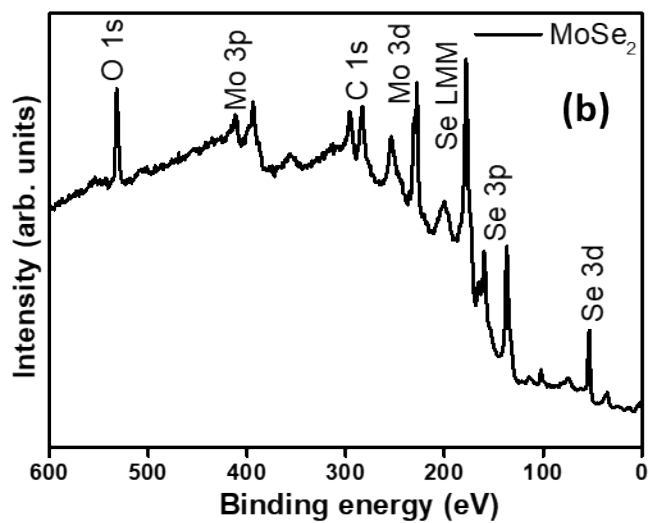

Figure S2. XPS survey scans for (a)  $\text{WSe}_2$  and (b)  $\text{MoSe}_2$ .

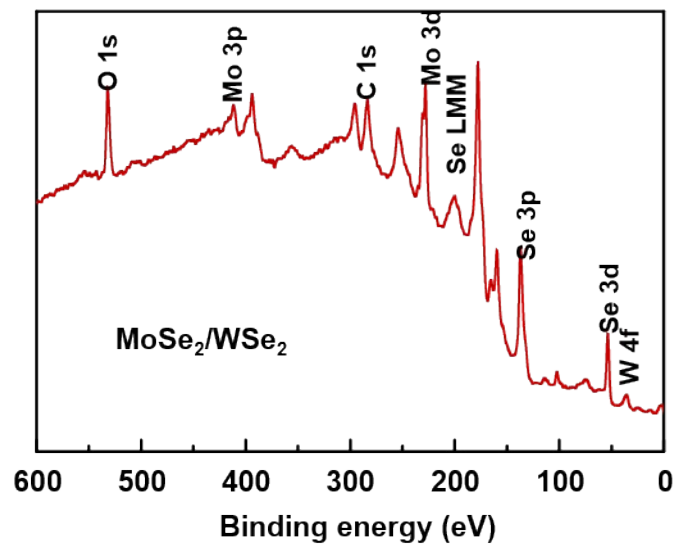

Figure S3. XPS survey scans of MoSe<sub>2</sub>/WSe<sub>2</sub> heterostructure.
